# Supplementary material for: Amplitude response of conical multiwalled carbon nanotube probes for atomic force microscopy
Source: Royal Society of Chemistry journal article supplement (doi:10.1039/c8ra08683d), 2019-01-01
Supplement: c8ra08683d1.pdf [file c8ra08683d1.pdf]

## Supplementary Information for

### **Amplitude response of conical multiwalled carbon nanotube probes for atomic force microscopy**

Xiao Hu,<sup>‡ab</sup> Hang Wei,<sup>‡ab</sup> Ya Deng,<sup>ab</sup> Xiannian Chi,<sup>ab</sup> Jia Liu,<sup>ab</sup> Junyi Yue,<sup>ab</sup>

Zhisheng Peng,<sup>ab</sup> Jinzhong Cai,<sup>ab</sup> Peng Jiang<sup>\*a</sup> and Lianfeng Sun<sup>\*a</sup>

*<sup>a</sup>CAS Key Laboratory of Nanosystem and Hierarchical Fabrication, CAS Center for Excellence in Nanoscience, National Center for Nanoscience and Technology, Beijing 100190, China. E-mail: slf@nanoctr.cn; pjiang@nanoctr.cn*

*<sup>b</sup>University of Chinese Academy of Sciences Beijing 100049, China  
Beijing 100190, China*

<sup>‡</sup> Xiao Hu and Hang Wei contributed to this work equally.

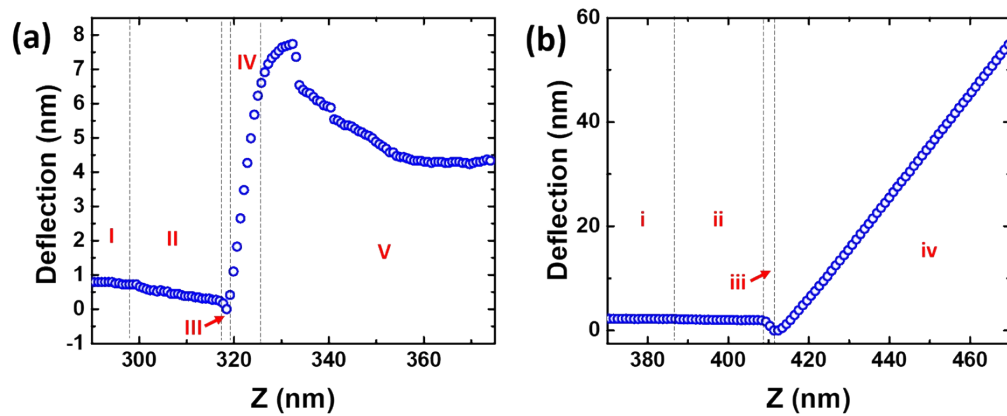

Figure S1. (a) Deflection-displacement curve of conical MWCNT probe. (b) Deflection-displacement curve of commercial probe. I, II, III, IV, V and i, ii, iii, iv represent the corresponding motion stages in Figure 3(a) and (b), respectively.

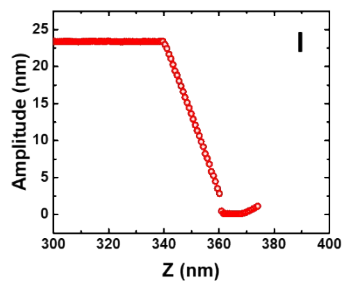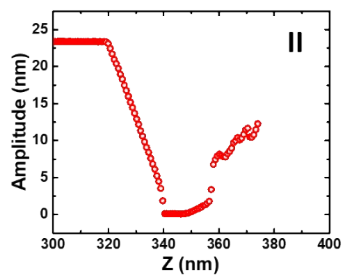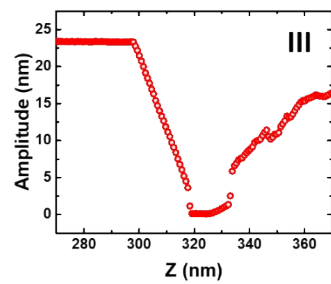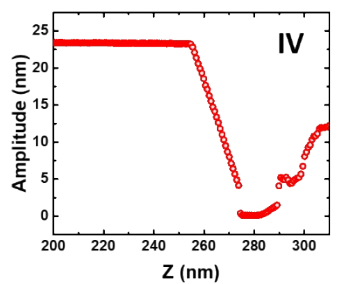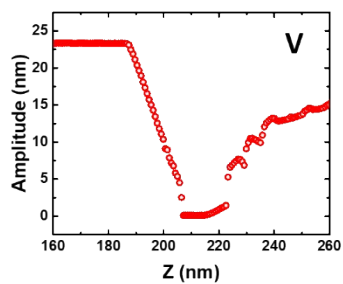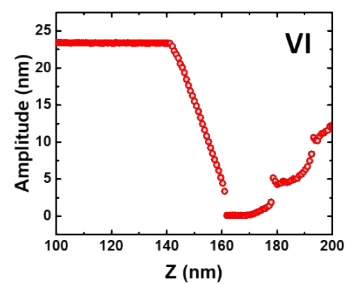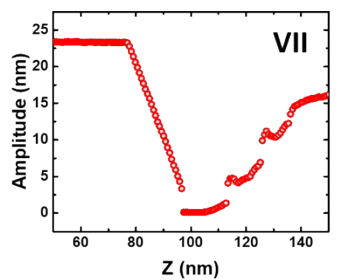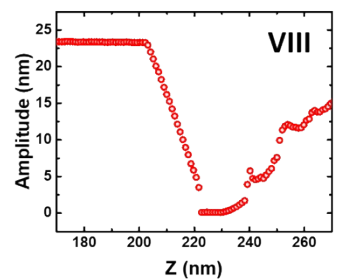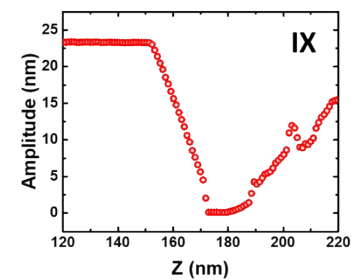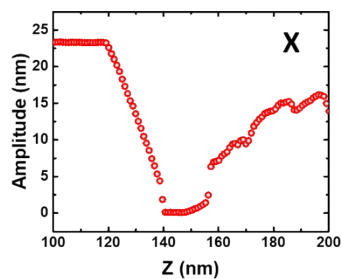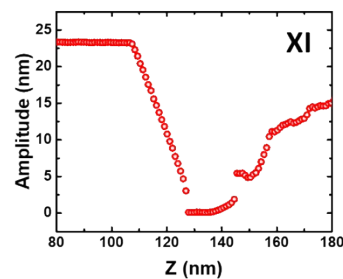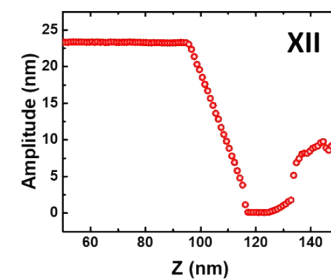

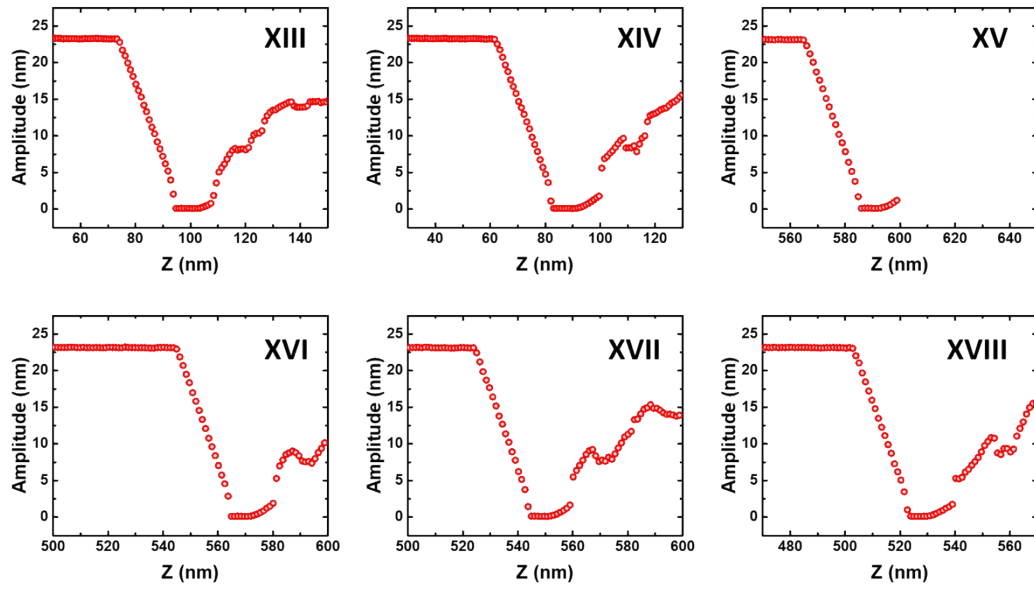

Figure S2. Typical amplitude-displacement curves for 18 times of a conical MWCNT probe. III is used as Figure 3(a) in the main context.

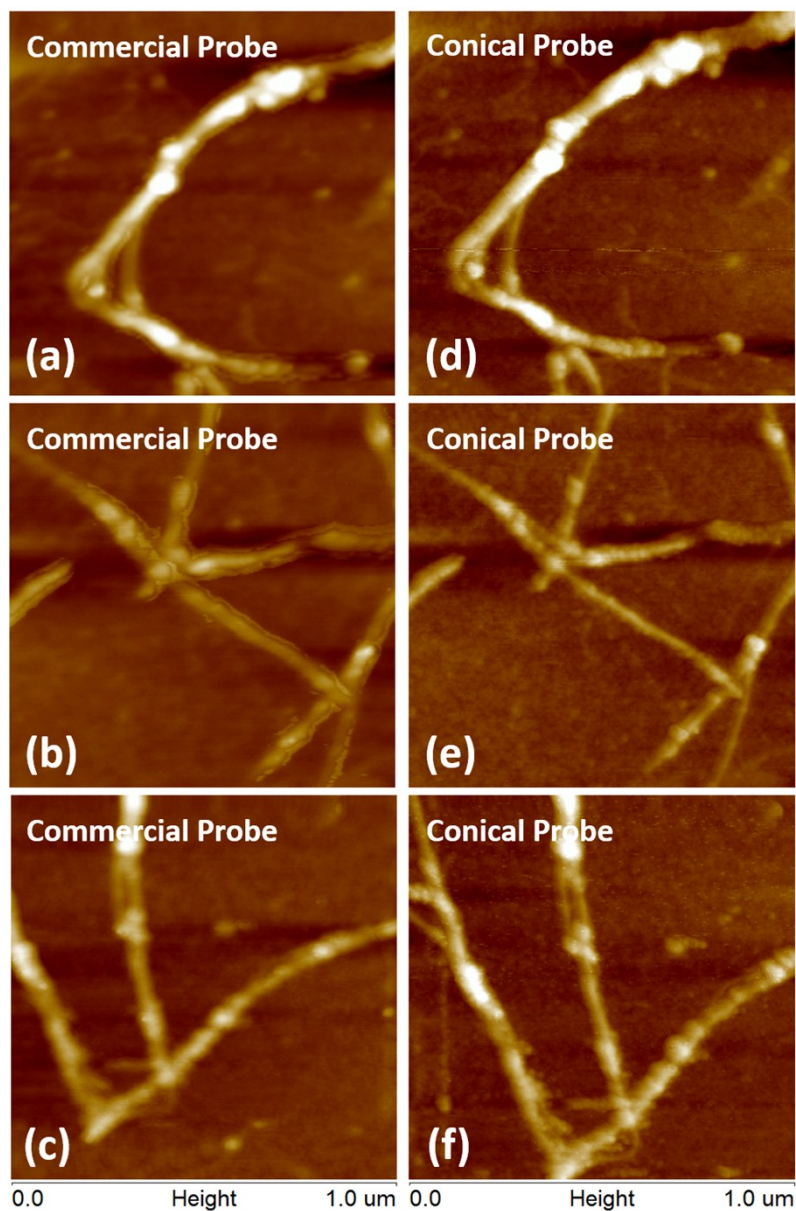

Figure S3. Comparison of the topography of SWCNT networks in 3 different positions. Topography in (a), (b), (c) is acquired by commercial probes. Topography in (d), (e), (f) corresponds to the same positions in (a), (b), (c) and is acquired by a MWCNT conical probe.

| Measurements | Probe       | W (nm) | h (nm) | estimated radius (nm) |
|--------------|-------------|--------|--------|-----------------------|
| 1            | MWCNT probe | 23.4   | 1.7    | 40.3                  |
| 2            | MWCNT probe | 24.1   | 1.7    | 42.7                  |
| 3            | MWCNT probe | 27.6   | 2.2    | 43.3                  |
| 4            | SCM-PIT     | 25.8   | 1.7    | 48.9                  |
| 5            | SCM-PIT     | 28.2   | 2.0    | 49.7                  |
| 6            | SCM-PIT     | 32.2   | 2.8    | 46.3                  |

Table S1. Estimation of the radius of a MWCNT probe and a commercial probe (SCM-PIT). The average radius of the MWCNT probe is 42.1 nm and the average radius of commercial probe is 48.3 nm
